# Supplementary material for: Conclusions in systematic reviews of mammography for breast cancer screening and associations with review design and author characteristics
Source: Springer Nature journal article supplement (doi:10.1186/s13643-017-0495-6), 2017-05-22
Supplement: MOESM1 [file 12305382]

| Age group | 20-24                     | 25-29 | 30-34 | 35-39 | 40-44 | 45-49 | 50-54 | 55-59 | 60-64 | 65-69 | 70-74 | 75-79 |
|-----------|---------------------------|-------|-------|-------|-------|-------|-------|-------|-------|-------|-------|-------|
| ≤49       | <40                       |       |       |       | 40-49 |       |       |       |       |       |       |       |
|           | 40-49                     |       |       |       |       | 40-49 |       |       |       |       |       |       |
|           | 45-49                     |       |       |       |       |       |       |       |       |       |       |       |
| 50 - 69   |                           |       |       |       | 40-49 |       |       |       |       |       |       |       |
|           |                           |       |       |       |       | 40-69 |       |       |       |       |       |       |
|           |                           |       |       |       |       |       | 43-67 |       |       | 60-69 |       |       |
|           |                           |       |       |       |       |       |       | 50-59 |       | 60-69 |       |       |
|           |                           |       |       |       |       |       |       |       | ≥50   |       |       |       |
| ≥70       |                           |       |       |       |       |       |       |       |       | 70-74 |       | 75-79 |
|           |                           |       |       |       |       |       |       |       |       |       | ≥75   |       |
| All       | 20-24                     |       |       |       | ≥40   |       |       |       |       |       |       |       |
|           | 25-29                     |       | ≥25   |       |       |       |       |       |       |       |       |       |
|           | All ages or not specified |       |       |       |       |       |       |       |       |       |       |       |

**Additional File 1.** Age group ranges identified in the systematic reviews and their classification in the analysis. Shaded regions represent the age groups used in the analysis (orange rectangles) and the set of all age groups identified in the systematic reviews are labelled by their reference number and age range (grey rectangles).
