# Supplementary material for: Conclusions in systematic reviews of mammography for breast cancer screening and associations with review design and author characteristics
Source: Springer Nature journal article supplement (doi:10.1186/s13643-017-0495-6), 2017-05-22
Supplement: MOESM7 [file 12305382]

**Additional Table 1.** Associations between systematic review characteristics and conclusions in 22 conclusions of studies that did not specify age group or specified all ages.

| Characteristics                 | Number of conclusions | Proportion of favourable conclusions (%) | p-value (chi-square test)    |
|---------------------------------|-----------------------|------------------------------------------|------------------------------|
| <b>Corresponding author</b>     |                       |                                          |                              |
| Non-clinical                    | 20                    | 6 (30%)                                  | p=0.56; X <sup>2</sup> =0.34 |
| Clinical                        | 2                     | 1 (50%)                                  |                              |
| <b>Competing interests</b>      |                       |                                          |                              |
| Declared none                   | 13                    | 4 (31%)                                  | p=0.31; X <sup>2</sup> =2.32 |
| No statement                    | 8                     | 2 (25%)                                  |                              |
| Declared                        | 1                     | 1 (100%)                                 |                              |
| <b>Type of evidence</b>         |                       |                                          |                              |
| RCT only                        | 3                     | 1 (33%)                                  | p=0.66; X <sup>2</sup> =1.61 |
| RCT and non-RCT                 | 7                     | 1 (14%)                                  |                              |
| Non-RCT only                    | 10                    | 4 (40%)                                  |                              |
| Cost-effectiveness              | 2                     | 1 (50%)                                  |                              |
| <b>Outcome measures</b>         |                       |                                          |                              |
| Did not include harms           | 10                    | 5 (50%)                                  | p=0.10; X <sup>2</sup> =2.79 |
| Included harms or overdiagnosis | 12                    | 2 (16%)                                  |                              |
| <b>Meta-analysis</b>            |                       |                                          |                              |
| Yes                             | 7                     | 1 (14%)                                  | p=0.23; X <sup>2</sup> =1.46 |
| No                              | 15                    | 6 (40%)                                  |                              |
