# Supplementary material for: Conclusions in systematic reviews of mammography for breast cancer screening and associations with review design and author characteristics
Source: Springer Nature journal article supplement (doi:10.1186/s13643-017-0495-6), 2017-05-22
Supplement: MOESM8 [file 12305382]

**Additional Table 2.** Associations between systematic review characteristics and conclusions in 10 conclusions of studies that included women aged up to 49 years.

| Characteristics                 | Number of conclusions | Proportion of favourable conclusions (%) | p-value (chi-square test)     |
|---------------------------------|-----------------------|------------------------------------------|-------------------------------|
| <b>Corresponding author</b>     |                       |                                          |                               |
| Non-clinical                    | 5                     | 2 (40%)                                  | p=1.00; X <sup>2</sup> =0.00  |
| Clinical                        | 5                     | 2 (40%)                                  |                               |
| <b>Competing interests</b>      |                       |                                          |                               |
| Declared none                   | 4                     | 2 (50%)                                  | p=0.44; X <sup>2</sup> =1.67  |
| No statement                    | 4                     | 2 (50%)                                  |                               |
| Declared                        | 2                     | 0 (0%)                                   |                               |
| <b>Type of evidence</b>         |                       |                                          |                               |
| RCT only                        | 4                     | 3 (75%)                                  | NA                            |
| RCT and non-RCT                 | 6                     | 1 (16%)                                  |                               |
| Non-RCT only                    | 0                     | NA                                       |                               |
| Cost-effectiveness              | 0                     | NA                                       |                               |
| <b>Outcome measures</b>         |                       |                                          |                               |
| Did not include harms           | 4                     | 3 (75%)                                  | p=0.065; X <sup>2</sup> =3.40 |
| Included harms or overdiagnosis | 6                     | 1 (16%)                                  |                               |
| <b>Meta-analysis</b>            |                       |                                          |                               |
| Yes                             | 2                     | 1 (50%)                                  | p=0.75; X <sup>2</sup> =0.10  |
| No                              | 8                     | 3 (38%)                                  |                               |
