# Supplementary material for: Conclusions in systematic reviews of mammography for breast cancer screening and associations with review design and author characteristics
Source: Syst Rev. 2017 May 22;6:105. doi: 10.1186/s13643-017-0495-6 (PMC5441061; doi:10.1186/s13643-017-0495-6)
Supplement: Supplementary file 2 — Authors’ professional roles; (C: clinican; N: non-clinician; G: group; triangles indicate the corresponding author). (PDF 602 kb) [file 13643_2017_495_MOESM2_ESM.pdf]

**Additional Table 5.** Author professional roles (C: clinician; N: non-clinician; G: group; triangles indicate the corresponding author)

| Conclusion by systematic review and age group | First author | Second author | Third author | Fourth author | Fifth author | Sixth author | Seventh author | Eight author | Ninth author | Tenth author | Eleventh author |
|-----------------------------------------------|--------------|---------------|--------------|---------------|--------------|--------------|----------------|--------------|--------------|--------------|-----------------|
| Armstrong, K.; 2007 <sup>1</sup> (40-49y)     | C▲           | C             | N            | N             | C            |              |                |              |              |              |                 |
| Autier, P.; 2011 <sup>2</sup>                 | N▲           | N             | N            | N             | N            | N            | N              |              |              |              |                 |
| Baker, S.; 2005 <sup>3</sup>                  | N▲           | C             | N            |               |              |              |                |              |              |              |                 |
| Biesheuvel,C.; 2007 <sup>6</sup> (40-49y)     | N▲           | N             | N            | N             | N            |              |                |              |              |              |                 |
| Biesheuvel,C.; 2007 <sup>6</sup> (50-59y)     | N▲           | N             | N            | N             | N            |              |                |              |              |              |                 |
| Biesheuvel,C.; 2007 <sup>6</sup> (60-69y)     | N▲           | N             | N            | N             | N            |              |                |              |              |              |                 |
| Bond, M.; 2013 <sup>7</sup>                   | N▲           | N             | N            | N             | N            | N            | N              |              |              |              |                 |
| Bond, M.; 2013 <sup>8</sup>                   | N▲           | N             | N            | N             | N            | N            | N              |              |              |              |                 |
| Brett, J.; 2005 <sup>9</sup>                  | N            | N             | N            | N             | N▲           |              |                |              |              |              |                 |
| Brewer, N. T.; 2007 <sup>10</sup>             | N▲           | N             | N            |               |              |              |                |              |              |              |                 |
| Elmore, J. G.; 2005 <sup>12</sup> (40-49y)    | C▲           | C             | C            | N             |              |              |                |              |              |              |                 |
| Erpeldinger, S.; 2013 <sup>13</sup>           | N▲           | N             | C            | C             | C            | N            | C              |              |              |              |                 |
| Gotzsche, P. C.;2000 <sup>16</sup>            | N▲           | N             |              |               |              |              |                |              |              |              |                 |
| Gotzsche, P. C.; 2013 <sup>17</sup>           | N▲           | N             |              |               |              |              |                |              |              |              |                 |
| Gotzsche, P. C.; 2006 <sup>18</sup>           | N▲           | N             |              |               |              |              |                |              |              |              |                 |
| Gotzsche, P. C.; 2009 <sup>19</sup>           | N▲           | N             |              |               |              |              |                |              |              |              |                 |
| Gotzsche, P. C.; 2011 <sup>20</sup>           | N▲           | N             |              |               |              |              |                |              |              |              |                 |
| Gotzsche, P. C.; 2011 <sup>21</sup>           | N▲           |               |              |               |              |              |                |              |              |              |                 |
| Hafslund, B.; 2009 <sup>23</sup>              | C▲           | N             |              |               |              |              |                |              |              |              |                 |
| Hamashima, C.; 2015 <sup>24</sup> (50+y)      | C▲           | C             | C            | N             | N            | N            | C              |              |              |              |                 |
| Hofvind, S.; 2012 <sup>26</sup>               | C▲           | N             | N            | N             | N            | N            | N              | C            | C            | G            |                 |
| Jorgensen, K. J.; 2009 <sup>28</sup>          | N▲           | N             |              |               |              |              |                |              |              |              |                 |
| Jorgensen, K. J.;2013 <sup>29</sup>           | N▲           |               |              |               |              |              |                |              |              |              |                 |
| Leung, G. M.; 2002 <sup>31</sup>              | N▲           | N             | N            | N             |              |              |                |              |              |              |                 |
| Metsala, E.; 2012 <sup>33</sup>               | N▲           | C             | N            |               |              |              |                |              |              |              |                 |
| Olsen, O.; 2001 <sup>36</sup>                 | N▲           | N             |              |               |              |              |                |              |              |              |                 |
| Pace, L. E.; 2014 <sup>37</sup> (40-49y)      | C            | N▲            |              |               |              |              |                |              |              |              |                 |
| Pace, L. E.; 2014 <sup>37</sup> (50-59y)      | C            | N▲            |              |               |              |              |                |              |              |              |                 |
| Pace, L. E.; 2014 <sup>37</sup> (60-69y)      | C            | N▲            |              |               |              |              |                |              |              |              |                 |
| Paesmans, M.; 2010 <sup>38</sup>              | N▲           | N             | N            | N             |              |              |                |              |              |              |                 |
| Puliti, D.; 2012 <sup>39</sup>                | N            | N             | N            | N             | N            | N            | C▲             | G            |              |              |                 |
| Ringash, J.;2001 <sup>41</sup>                | C▲           | G             |              |               |              |              |                |              |              |              |                 |
| Walter, L. C. ; 2014 <sup>47</sup> (Biennial) | C▲           | C             |              |               |              |              |                |              |              |              |                 |
| Yoo, K. B.; 2013 <sup>49</sup>                | N            | N             | N            | N             | N            | N            | N              | N            | N▲           |              |                 |
| Armstrong, K.; 2007 <sup>1</sup> (50y+)       | C▲           | C             | N            | N             | C            |              |                |              |              |              |                 |
| Baker, S.; 2005 <sup>4</sup>                  | N▲           | C             | N            |               |              |              |                |              |              |              |                 |
| Barratt, A. L.; 2002 <sup>5</sup>             | N▲           | C             | N            | N             | N            |              |                |              |              |              |                 |
| Broeders, M.; 2012 <sup>11</sup>              | N▲           | N             | N            | N             | N            | N            | N              | N            | N            | N            | G               |
| Elmore, J. G.; 2005 <sup>12</sup> (60-69y)    | C▲           | C             | C            | N             |              |              |                |              |              |              |                 |
| Elmore, J. G.; 2005 <sup>12</sup> (70+)       | C▲           | C             | C            | N             |              |              |                |              |              |              |                 |
| Gabe, R.; 2005 <sup>14</sup>                  | N▲           | N             |              |               |              |              |                |              |              |              |                 |
| Galit, W.; 2007 <sup>15</sup>                 | N            | N             | N▲           |               |              |              |                |              |              |              |                 |
| Green, B. B.; 2003 <sup>22</sup>              | N▲           | N             |              |               |              |              |                |              |              |              |                 |
| Hamashima, C.; 2015 <sup>24</sup> (40-49y)    | C▲           | C             | C            | N             | N            | N            | C              |              |              |              |                 |
| Harris, R.; 2011 <sup>25</sup>                | N▲           | N             | N            |               |              |              |                |              |              |              |                 |
| Jones, B. A.; 2003 <sup>27</sup>              | N▲           | N             | N            |               |              |              |                |              |              |              |                 |
| Lee, S. J.; 2013 <sup>30</sup>                | C▲           | N             | N            | C             | N            | N            |                |              |              |              |                 |
| Mandelblatt, J.; 2003 <sup>32</sup>           | C▲           | N             | N            | N             | C            | N            | C              | N            |              |              |                 |
| Moss, S. M.; 2012 <sup>34</sup>               | N▲           | N             | N            | N             | N            | N            | N              | G            |              |              |                 |
| Njor, S.; 2012 <sup>35</sup>                  | N▲           | N             | N            | N             | N            | N            | N              | G            |              |              |                 |
| Ravert, P. K.; 2010 <sup>40</sup>             | C▲           | C             |              |               |              |              |                |              |              |              |                 |
| Royak-Schaler, R.; 2002 <sup>42</sup>         | N▲           | N             |              |               |              |              |                |              |              |              |                 |
| Scheel, J. R.; 2015 <sup>43</sup>             | C▲           | C             | N            | C             | C            |              |                |              |              |              |                 |
| Schopper, D.; 2009 <sup>44</sup>              | N▲           | C             |              |               |              |              |                |              |              |              |                 |
| Suzuki, A.; 2014 <sup>45</sup>                | C            | C             | C▲           |               |              |              |                |              |              |              |                 |
| Tange, U. B.; 2002 <sup>46</sup>              | C▲           | N             | C            | C             | C            | C            | N              |              |              |              |                 |
| Walter, L. C. ; 2014 <sup>47</sup> (Annual)   | C▲           | C             |              |               |              |              |                |              |              |              |                 |
| Yarbrough, S. S.;2004 <sup>48</sup>           | C▲           |               |              |               |              |              |                |              |              |              |                 |
| Zelle, S. G.; 2013 <sup>50</sup>              | N▲           | N             |              |               |              |              |                |              |              |              |                 |
