# Supplementary material for: Conclusions in systematic reviews of mammography for breast cancer screening and associations with review design and author characteristics
Source: Syst Rev. 2017 May 22;6:105. doi: 10.1186/s13643-017-0495-6 (PMC5441061; doi:10.1186/s13643-017-0495-6)
Supplement: Supplementary file 5 — Associations between systematic review characteristics and conclusions in 5 conclusions of studies that included women aged 70 years and older. (PDF 193 kb) [file 13643_2017_495_MOESM5_ESM.pdf]

**Additional Table 3.** Associations between systematic review characteristics and conclusions in 5 conclusions of studies that included women aged 70 years and older.

| Characteristics                 | Number of conclusions | Proportion of favourable conclusions (%) | p-value (chi-square test)    |
|---------------------------------|-----------------------|------------------------------------------|------------------------------|
| <b>Corresponding author</b>     |                       |                                          |                              |
| Non-clinical                    | 2                     | 2 (100%)                                 | p=0.36; X <sup>2</sup> =0.83 |
| Clinical                        | 3                     | 2 (67%)                                  |                              |
| <b>Competing interests</b>      |                       |                                          |                              |
| Declared none                   | 3                     | 2 (67%)                                  | p=0.66; X <sup>2</sup> =0.83 |
| No statement                    | 1                     | 1 (100%)                                 |                              |
| Declared                        | 1                     | 1 (100%)                                 |                              |
| <b>Type of evidence</b>         |                       |                                          |                              |
| RCT only                        | 0                     | NA                                       | NA                           |
| RCT and non-RCT                 | 1                     | 1 (100%)                                 |                              |
| Non-RCT only                    | 4                     | 3 (75%)                                  |                              |
| Cost-effectiveness              | 0                     | NA                                       |                              |
| <b>Outcome measures</b>         |                       |                                          |                              |
| Did not include harms           | 1                     | 1 (100%)                                 | p=0.58; X <sup>2</sup> =0.31 |
| Included harms or overdiagnosis | 4                     | 3 (75%)                                  |                              |
| <b>Meta-analysis</b>            |                       |                                          |                              |
| Yes                             | 0                     | NA                                       | NA                           |
| No                              | 5                     | 4 (80%)                                  |                              |
