# Supplementary material for: Conclusions in systematic reviews of mammography for breast cancer screening and associations with review design and author characteristics
Source: Syst Rev. 2017 May 22;6:105. doi: 10.1186/s13643-017-0495-6 (PMC5441061; doi:10.1186/s13643-017-0495-6)
Supplement: Supplementary file 6 — Included systematic review conclusions in detail. (PDF 774 kb) [file 13643_2017_495_MOESM6_ESM.pdf]

**Additional Table 4.** Included systematic review conclusion characteristics in detail.

|                                               | Type of Evidence  |      |                        |                    | Outcome Measures |                |                |                       |                  |                |                  |                    | Authors                 |                    |                        | Competing Interests |               |          | Age Groups              |          |       | Type of Analysis |               | Conclusion       |            |                |
|-----------------------------------------------|-------------------|------|------------------------|--------------------|------------------|----------------|----------------|-----------------------|------------------|----------------|------------------|--------------------|-------------------------|--------------------|------------------------|---------------------|---------------|----------|-------------------------|----------|-------|------------------|---------------|------------------|------------|----------------|
| Conclusion by systematic review and age group | Controlled trials | Both | Non-controlled studies | Cost effectiveness | Mortality        | Over-diagnosis | False positive | Unnecessary treatment | Radiation cancer | Anxiety/ Worry | Pain/ discomfort | Cost Effectiveness | Clinician corresponding | Mixed author group | Non-clinician corresp. | No statement        | Declared none | Declared | Not specified/ All ages | Up to 49 | 50-69 | 70 and over      | Meta-analysis | No meta-analysis | Favourable | Not favourable |
| Armstrong, K.; 2007 <sup>1</sup> (40-49y)     |                   | X    |                        |                    | X                | X              | X              |                       | X                |                | X                |                    | X                       | X                  |                        |                     |               | X        |                         | X        |       |                  |               | X                |            | X              |
| Autier, P.; 2011 <sup>2</sup>                 |                   |      | X                      |                    | X                |                |                |                       |                  |                |                  |                    |                         |                    | X                      |                     | X             |          | X                       |          |       |                  |               | X                |            | X              |
| Baker, S.; 2005 <sup>3</sup>                  | X                 |      |                        |                    | X                | X              | X              |                       | X                |                |                  | X                  |                         | X                  | X                      | X                   |               |          |                         |          | X     |                  |               | X                |            | X              |
| Biesheuvel, C.; 2007 <sup>6</sup> (40-49y)    |                   | X    |                        |                    |                  | X              |                |                       |                  |                |                  |                    |                         |                    | X                      | X                   |               |          |                         | X        |       |                  |               | X                |            | X              |
| Biesheuvel, C.; 2007 <sup>6</sup> (50-59y)    |                   | X    |                        |                    |                  | X              |                |                       |                  |                |                  |                    |                         |                    | X                      | X                   |               |          |                         |          | X     |                  |               | X                |            | X              |
| Biesheuvel, C.; 2007 <sup>6</sup> (60-69y)    |                   | X    |                        |                    |                  | X              |                |                       |                  |                |                  |                    |                         |                    | X                      | X                   |               |          |                         |          | X     |                  |               | X                |            | X              |
| Bond, M.; 2013 <sup>7</sup>                   |                   | X    |                        |                    |                  |                |                |                       |                  | X              |                  |                    |                         |                    | X                      | X                   |               | X        |                         |          |       |                  |               | X                |            | X              |
| Bond, M.; 2013 <sup>8</sup>                   |                   | X    |                        |                    |                  |                |                |                       |                  | X              |                  |                    |                         |                    | X                      | X                   |               | X        |                         |          |       |                  | X             |                  |            | X              |
| Brett, J.; 2005 <sup>9</sup>                  |                   |      | X                      |                    |                  |                |                |                       |                  | X              |                  |                    |                         |                    | X                      | X                   |               | X        |                         |          |       | X                |               | X                |            | X              |
| Brewer, N. T.; 2007 <sup>10</sup>             |                   |      | X                      |                    |                  |                |                |                       |                  | X              |                  |                    |                         |                    | X                      | X                   |               | X        |                         |          |       |                  | X             |                  |            | X              |
| Elmore, J. G.; 2005 <sup>12</sup> (40-49y)    |                   | X    |                        |                    | X                | X              | X              |                       |                  |                | X                |                    | X                       | X                  |                        |                     |               | X        |                         | X        |       |                  |               | X                |            | X              |
| Erpeldinger, S.; 2013 <sup>13</sup>           | X                 |      |                        |                    | X                |                |                |                       |                  |                |                  |                    |                         | X                  | X                      |                     | X             |          | X                       |          |       |                  | X             |                  |            | X              |
| Gotzsche, P. C.; 2000 <sup>16</sup>           | X                 |      |                        |                    | X                |                |                |                       |                  |                |                  |                    |                         |                    | X                      | X                   |               | X        |                         | X        |       |                  | X             |                  |            | X              |
| Gotzsche, P. C.; 2013 <sup>17</sup>           |                   | X    |                        |                    | X                | X              |                | X                     |                  | X              |                  |                    |                         |                    | X                      | X                   |               | X        |                         | X        |       |                  |               | X                |            | X              |
| Gotzsche, P. C.; 2006 <sup>18</sup>           |                   | X    |                        |                    | X                | X              | X              |                       |                  | X              | X                |                    |                         |                    | X                      | X                   |               | X        |                         |          |       | X                |               | X                |            | X              |
| Gotzsche, P. C.; 2009 <sup>19</sup>           |                   | X    |                        |                    | X                | X              | X              | X                     | X                | X              |                  |                    |                         |                    | X                      | X                   |               | X        |                         | X        |       |                  |               | X                |            | X              |
| Gotzsche, P. C.; 2011 <sup>20</sup>           |                   | X    |                        |                    | X                | X              |                | X                     |                  | X              | X                |                    |                         |                    | X                      | X                   |               | X        |                         |          |       | X                |               | X                |            | X              |
| Gotzsche, P. C.; 2011 <sup>21</sup>           |                   | X    |                        |                    | X                |                |                |                       |                  |                |                  |                    |                         |                    | X                      | X                   |               | X        |                         | X        |       |                  |               | X                |            | X              |
| Hafslund, B.; 2009 <sup>23</sup>              |                   |      | X                      |                    |                  |                |                |                       |                  | X              |                  | X                  | X                       | X                  |                        | X                   |               | X        |                         | X        |       |                  |               | X                |            | X              |
| Hamashima, C.; 2015 <sup>24</sup> (50+y)      | X                 |      |                        |                    | X                |                |                |                       |                  |                |                  |                    | X                       | X                  |                        | X                   |               | X        |                         |          |       | X                |               | X                |            | X              |
| Hofvind, S.; 2012 <sup>26</sup>               |                   |      | X                      |                    |                  |                | X              |                       |                  |                |                  |                    | X                       | X                  |                        | X                   |               |          |                         |          | X     |                  |               | X                |            | X              |
| Jorgensen, K. J.; 2009 <sup>28</sup>          |                   |      | X                      |                    |                  | X              |                |                       |                  |                |                  |                    |                         |                    | X                      |                     | X             |          | X                       |          |       |                  | X             |                  |            | X              |
| Jorgensen, K. J.; 2013 <sup>29</sup>          |                   | X    |                        |                    |                  | X              |                |                       |                  |                |                  |                    |                         |                    | X                      | X                   |               |          | X                       |          |       |                  |               | X                |            | X              |
| Leung, G. M.; 2002 <sup>31</sup>              | X                 |      |                        |                    | X                |                |                |                       |                  |                |                  |                    |                         |                    | X                      | X                   |               |          |                         |          | X     |                  | X             |                  | X          | X              |
| Metsala, E.; 2012 <sup>33</sup>               |                   |      | X                      |                    |                  |                |                |                       |                  | X              |                  |                    |                         | X                  | X                      | X                   |               |          | X                       |          |       |                  | X             |                  |            | X              |
| Olsen, O.; 2001 <sup>36</sup>                 | X                 |      |                        |                    | X                |                |                |                       |                  |                |                  |                    |                         |                    | X                      |                     | X             |          |                         |          | X     |                  | X             |                  |            | X              |
| Pace, L. E.; 2014 <sup>37</sup> (40-49y)      |                   | X    |                        |                    | X                | X              | X              |                       |                  |                |                  |                    |                         | X                  | X                      |                     | X             |          |                         |          | X     |                  |               | X                |            | X              |
| Pace, L. E.; 2014 <sup>37</sup> (50-59y)      |                   | X    |                        |                    | X                | X              | X              |                       |                  |                |                  |                    |                         | X                  | X                      |                     | X             |          |                         |          | X     |                  |               | X                |            | X              |
| Pace, L. E.; 2014 <sup>37</sup> (60-69y)      |                   | X    |                        |                    | X                | X              | X              |                       |                  |                |                  |                    |                         | X                  | X                      |                     | X             |          |                         |          | X     |                  |               | X                |            | X              |
| Paasmans, M.; 2010 <sup>38</sup>              | X                 |      |                        |                    | X                | X              | X              | X                     |                  |                |                  |                    |                         |                    | X                      | X                   |               | X        |                         |          |       | X                |               | X                |            | X              |
| Puliti, D.; 2012 <sup>39</sup>                |                   |      | X                      |                    |                  | X              |                |                       |                  |                |                  |                    |                         | X                  | X                      | X                   |               |          | X                       |          |       |                  |               | X                |            | X              |
| Ringash, J.; 2001 <sup>41</sup>               |                   | X    |                        |                    | X                |                |                |                       |                  |                |                  |                    | X                       | X                  |                        | X                   |               |          |                         |          | X     |                  | X             |                  |            | X              |
| Walter, L. C. ; 2014 <sup>47</sup> (Biennial) |                   |      | X                      |                    |                  |                | X              |                       |                  |                |                  |                    | X                       |                    |                        |                     | X             |          |                         |          |       | X                |               | X                |            | X              |
| Yoo, K. B.; 2013 <sup>49</sup>                |                   |      |                        | X                  |                  |                |                |                       |                  |                |                  | X                  |                         |                    | X                      | X                   |               |          | X                       |          |       |                  |               | X                |            | X              |
| Armstrong, K.; 2007 <sup>1</sup> (50+y)       |                   | X    |                        |                    | X                | X              | X              |                       | X                |                | X                |                    | X                       | X                  |                        |                     |               | X        |                         |          | X     |                  |               | X                | X          |                |
| Baker, S.; 2005 <sup>4</sup>                  | X                 |      |                        |                    | X                |                |                |                       |                  |                |                  |                    |                         | X                  | X                      | X                   |               |          |                         |          | X     |                  |               | X                | X          |                |
| Barratt, A. L.; 2002 <sup>5</sup>             |                   |      | X                      |                    |                  |                |                |                       |                  |                |                  | X                  |                         | X                  | X                      |                     | X             |          |                         |          |       | X                |               | X                | X          |                |
| Broeders, M.; 2012 <sup>11</sup>              |                   |      | X                      |                    | X                |                |                |                       |                  |                |                  |                    |                         |                    | X                      | X                   |               |          |                         |          | X     |                  |               | X                |            | X              |
| Elmore, J. G.; 2005 <sup>12</sup> (60-69y)    |                   | X    |                        |                    | X                | X              | X              |                       |                  |                | X                |                    | X                       | X                  |                        |                     |               | X        |                         |          | X     |                  |               | X                | X          |                |
| Elmore, J. G.; 2005 <sup>12</sup> (70+)       |                   | X    |                        |                    | X                | X              | X              |                       |                  |                | X                |                    | X                       | X                  |                        |                     |               | X        |                         |          |       | X                |               | X                | X          |                |
| Gabe, R.; 2005 <sup>14</sup>                  |                   |      | X                      |                    | X                |                |                |                       |                  |                |                  |                    |                         |                    | X                      |                     | X             |          | X                       |          |       |                  | X             |                  | X          |                |
| Galit, W.; 2007 <sup>15</sup>                 |                   |      | X                      |                    | X                | X              |                |                       |                  |                |                  | X                  |                         |                    | X                      | X                   |               |          |                         |          |       | X                |               | X                | X          |                |
| Green, B. B.; 2003 <sup>22</sup>              | X                 |      |                        |                    | X                | X              | X              |                       |                  |                |                  |                    |                         |                    | X                      | X                   |               |          | X                       |          |       | X                |               | X                | X          |                |
| Hamashima, C.; 2015 <sup>24</sup> (40-49y)    | X                 |      |                        |                    | X                |                |                |                       |                  |                |                  |                    | X                       | X                  |                        |                     | X             |          |                         | X        |       |                  | X             |                  | X          |                |
| Harris, R.; 2011 <sup>25</sup>                |                   |      | X                      |                    | X                |                |                |                       |                  |                |                  |                    |                         |                    | X                      | X                   |               |          |                         |          | X     |                  |               | X                | X          |                |
| Jones, B. A.; 2003 <sup>27</sup>              |                   | X    |                        |                    | X                |                |                |                       |                  |                |                  |                    |                         |                    | X                      |                     |               | X        | X                       |          |       |                  | X             | X                |            |                |
| Lee, S. J.; 2013 <sup>30</sup>                | X                 |      |                        |                    | X                |                |                |                       |                  |                |                  |                    | X                       | X                  |                        |                     |               | X        |                         |          | X     |                  | X             |                  | X          |                |
| Mandelblatt, J.; 2003 <sup>32</sup>           |                   |      |                        | X                  |                  |                |                |                       |                  |                |                  | X                  | X                       | X                  |                        |                     | X             |          |                         |          | X     |                  |               | X                | X          |                |
| Moss, S. M.; 2012 <sup>34</sup>               |                   |      | X                      |                    | X                |                |                |                       |                  |                |                  |                    |                         | X                  | X                      | X                   |               |          | X                       |          |       |                  |               | X                | X          |                |
| Njor, S.; 2012 <sup>35</sup>                  |                   |      | X                      |                    | X                |                |                |                       |                  |                |                  |                    |                         | X                  | X                      | X                   |               |          |                         |          | X     |                  |               | X                | X          |                |
| Ravert, P. K.; 2010 <sup>40</sup>             |                   |      | X                      |                    |                  |                | X              |                       |                  |                |                  |                    | X                       |                    |                        |                     | X             |          | X                       |          |       |                  |               | X                | X          |                |
| Royak-Schaler, R.; 2002 <sup>42</sup>         |                   | X    |                        |                    | X                |                |                |                       |                  |                |                  |                    |                         |                    | X                      | X                   |               |          |                         |          | X     |                  |               | X                | X          |                |
| Scheel, J. R.; 2015 <sup>43</sup>             |                   |      | X                      |                    |                  | X              | X              |                       |                  |                |                  |                    | X                       | X                  |                        |                     |               | X        |                         |          | X     |                  |               | X                | X          |                |
| Schopper, D.; 2009 <sup>44</sup>              |                   |      | X                      |                    | X                |                |                |                       |                  |                |                  |                    |                         | X                  | X                      |                     | X             |          | X                       |          |       |                  |               | X                | X          |                |
| Suzuki, A.; 2014 <sup>45</sup>                | X                 |      |                        |                    | X                | X              | X              | X                     | X                |                |                  |                    | X                       |                    |                        |                     |               |          |                         |          | X     |                  |               | X                | X          |                |
| Tange, U. B.; 2002 <sup>46</sup>              |                   | X    |                        |                    |                  |                | X              | X                     |                  |                |                  |                    | X                       | X                  |                        |                     | X             |          |                         |          | X     |                  |               | X                | X          |                |
| Walter, L. C. ; 2014 <sup>47</sup> (Annual)   |                   |      | X                      |                    | X                | X              | X              |                       |                  |                |                  | X                  | X                       |                    |                        |                     | X             |          |                         |          |       | X                |               | X                | X          |                |
| Yarbrough, S. S.; 2004 <sup>48</sup>          |                   | X    |                        |                    | X                |                |                |                       |                  |                |                  |                    | X                       |                    |                        |                     |               |          |                         |          |       | X                |               | X                | X          |                |
| Zelle, S. G.; 2013 <sup>50</sup>              |                   |      |                        | X                  |                  |                |                |                       |                  |                |                  | X                  |                         |                    | X                      |                     | X             |          | X                       |          |       |                  |               | X                | X          |                |
